# Supplementary material for: Prognostic value of albumin to globulin ratio in non-muscle-invasive bladder cancer
Source: PubMed Central journal article supplement (PMC8510920; doi:10.1007/s00345-020-03586-1), 2021-01-26

Supplementary figure 1: Recurrence-free survival in 1096 patients with non-muscle-invasive bladder cancer, stratified by preoperative serum Albumin to-Globulin ratio (AGR).

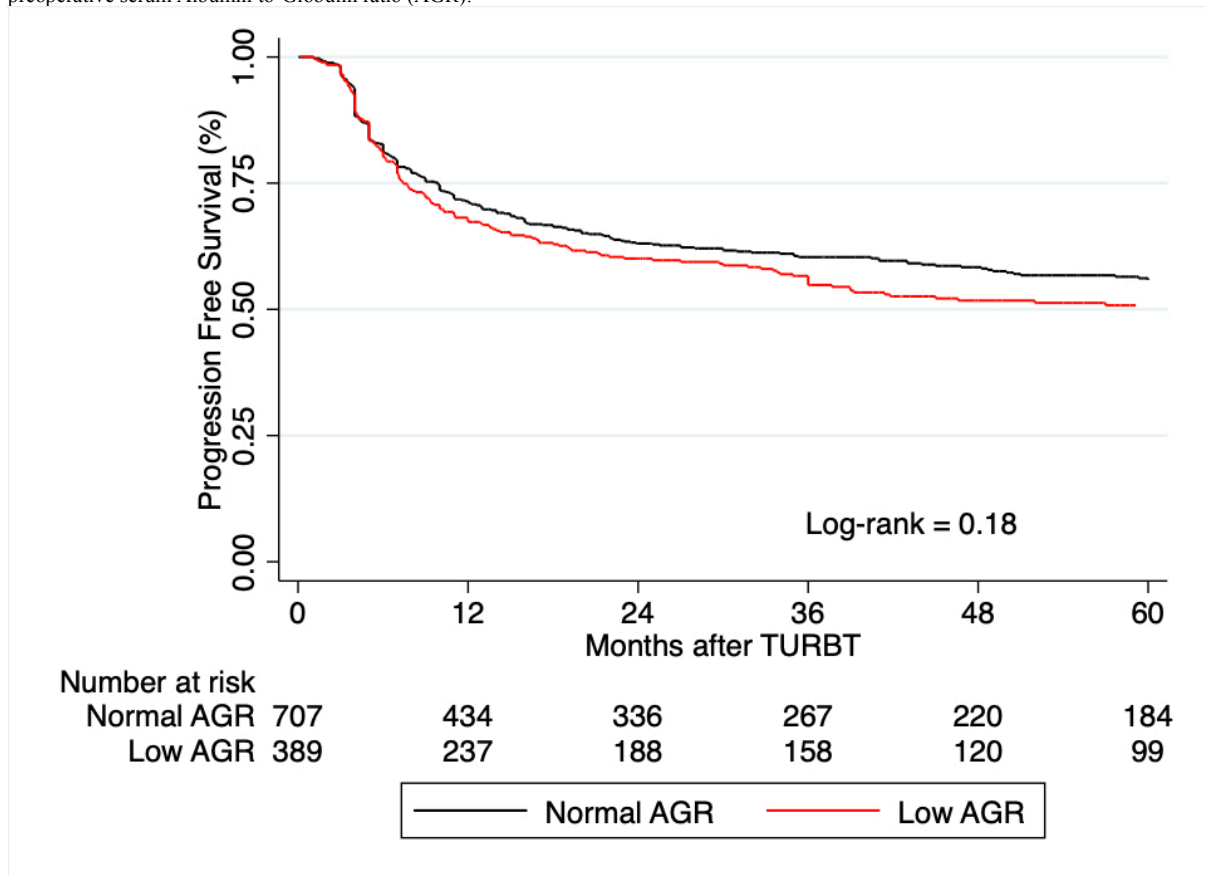

Supplement: 345_2020_3586_MOESM1_ESM.pdf [file 345_2020_3586_MOESM1_ESM.pdf]
